# Supplementary material for: The UNITE database for molecular identification and taxonomic communication of fungi and other eukaryotes: sequences, taxa and classifications reconsidered
Source: Oxford University Press journal article supplement (doi:10.1093/nar/gkad1039), 2023-11-11
Supplement: gkad1039_supplemental_file.pdf [file gkad1039_supplemental_file.pdf]

# Supplementary Figure 1. Visualization of the *Rhizopogon verii* species hypothesis (SH) in UNITE 9.0.

PlutoF DOI
doi.plutof.ut.ee/doi/10.15156/BIO/SH1219438.09FU

**PlutoF**
Species Hypotheses pages
unit community
Data hosted by **PlutoF**

**Species Hypotheses (SH)**
Widescreen FASTA Curate

**Rhizopogon verii** | SH1219438.09FU

**Communication of the SH**

**Digital Object Identifier (DOI)** <https://dx.doi.org/10.15156/BIO/SH1219438.09FU>

**Taxon name** Rhizopogon verii

---

**Placement in classification and Taxon Hypotheses**

Fungi (TH068972) / Dikarya (TH069005) / Basidiomycota (TH069042) / Agaricomycotina (TH069209) / Agaricomycetes (TH069290) / Boletales (TH069632) / Rhizopogonaceae (TH072692) / Rhizopogon (TH074613)

---

**Reference sequence**

**Accession number** AM085531

**Chosen by** María Paz Martín Esteban, 26/03/2015 12:57:03

---

Ecology Taxonomy Statistics History

**EcM lineage** suillus-rhizopogon (62)

**Interacting taxa** Pinus radiata (1); Pinus pinaster (7); Pinus sylvestris (43); Pinus (2); Pinus strobus (1); Pinus taeda (1)

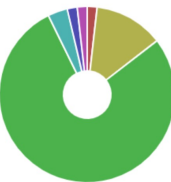


---



\* Locations without exact coordinates are displayed as country centroids

---

**DOI metadata**

**Title** SH1219438.09FU

**Publisher** UNITE Community

**Published** 2023

**Citation** Köljalg, Urmas; Abarenkov, Kessy; Nilsson, R. Henrik; Larsson, Karl-Henrik; May, Tom W.; Taylor, A.F.S.; Frøslev, Tobias G.; Pawłowska, Julia; Lindahl, Björn; Smith, Matthew E. et al. (2023): SH1219438.09FU. UNITE Community. 10.15156/BIO/SH1219438.09FU

**Downloads** SH1219438.09FU, SH1219438.09FU\_graph, SH1219438.09FU\_3

---

**Individuals of the current SH (total: 257, core: 81)**

Level 1 (17)   Level 2 (31)   Level 3 (42)   Level 4 (44)   Level 5 (92)   Level 6 (92)   Level 7 (257)

Sequences within the same 1.0% SH for the same continent collapsed

| Sequence ID | UNITE taxon name      | INSD taxon name                | Source                  | Interacting taxa | Area           | Conservation | Sequence                       |
|-------------|-----------------------|--------------------------------|-------------------------|------------------|----------------|--------------|--------------------------------|
| UDB001618   | +105 Rhizopogon verii |                                | Fruitlet: DG05-22       |                  | United Kingdom | 100%         | .....A G G A C G A T T A A T G |
| AM085531    | +17 Rhizopogon verii  | Rhizopogon verii               | Fruitlet: TVER_H_AQUI   |                  | Tunisia        | 100%         | .....G A T T A A T G           |
| JD075973    | Rhizopogon verii      | Rhizopogon verii               | Plant-associated sample | Pinus pinaster   | Unspecified    | 100%         | .....A T T G                   |
| UDB06489152 | +98 Rhizopogon        | uncultured fungus              | Soil sample: TUE001090  |                  | Colombia       | 100%         | .....A T G                     |
| UDB06501607 | +20 Rhizopogon        |                                | Soil sample: TUE002544  |                  | New Zealand    | 100%         | .....A T G                     |
| UDB06485747 | Rhizopogon            |                                | Soil sample: TUE000276  |                  | Madagascar     | 100%         | .....A T G                     |
| UDB06485675 | Rhizopogon            |                                | Soil sample: TUE000226  |                  | Estonia        | 100%         | .....A T G                     |
| AJ307687    | Rhizopogon            | ectomycorrhizal isolate ECM 12 | Plant-associated sample | Pinus            | France         | 100%         | .....                          |
| UDB06501579 | Rhizopogon            |                                | Soil sample: TUE02544   |                  | New Zealand    | 100%         | .....                          |
| UDB06489218 | Rhizopogon            |                                | Soil sample: TUE001091  |                  | Colombia       | 100%         | .....A T G                     |
| LN875271    | Rhizopogon verii      | Rhizopogon verii               |                         | Pinus sylvestris | Germany        | 100%         | .....G A T T A A T G           |
| UDB06485705 | Rhizopogon            |                                | Soil sample: TUE000276  |                  | Madagascar     | 100%         | .....                          |
| UDB06504868 | Rhizopogon            |                                | Soil sample: TUE003144  |                  | South Africa   | 100%         | .....A T G A                   |
| UDB06507510 | Rhizopogon            |                                | Soil sample: TUE003356  |                  | Estonia        | 100%         | .....A T G                     |
| UDB06489196 | Rhizopogon            |                                | Soil sample: TUE001091  |                  | Colombia       | 100%         | .....A T G                     |
| UDB06507507 | Rhizopogon            |                                | Soil sample: TUE003356  |                  | Estonia        | 100%         | .....A T G                     |
| UDB06504557 | Rhizopogon            |                                | Soil sample: TUE003135  |                  | Portugal       | 100%         | .....A T G                     |

# Supplementary Figure 2. Visualization of the taxon hypothesis (TH) of the fungal order *Boletales* in UNITE 9.0.

Plutof DOI [10.15156/BIO/TH069632](https://doi.org/10.15156/BIO/TH069632)

Plutof Open Workbench

## Boletales | TH069632

*Taxon Hypothesis pages* **unit** community Data hosted by **Plutof**

### Taxonomy

**Placement in taxonomy**  
Fungi (TH068972); Dikarya (TH069005); Basidiomycota (TH069042); Agaricomycetes (TH069290)

**Children**  
Calostomataceae (TH070293); Gyrodontaceae (TH070318); Hygrophoropsidaceae (TH070698); Suillaceae (TH070720); Astraeaceae (TH071050); Paxillaceae (TH071301); Boletales *fam. incertae sedis* (TH071427); Boletaceae (TH071498); Coniophoraceae (TH071600); Duplicystaceae (TH071648) [Show more](#)

### Statistics

|                         |     |
|-------------------------|-----|
| Number of SHs           | 979 |
| Number of ITS sequences | 858 |

### Ecology

**Interacting taxa**  
Asteropeia mcphersonii (1); Fagus sylvatica (1); Quercus (7); Betula alnoides (6); Oreamunnea mexicana (5); Quercus oleoides (5); Pinus densiflora (4); Pyrolo japonica (4); Asteropeia (3); Coccoloba uvifera (3) [Show more](#)

**EcM lineage**  
boletus (139); suillus-rhizopogon (52); paxillus-gyrodon (37); non-ectomycorrhizal (8); pisolithus-scleroderma (5)

5000 km  
Leaflet | © Mapbox © OpenStreetMap

\* Locations without exact coordinates are displayed as country centroids

### Metadata

|           |                                                                                                                                                                                                       |
|-----------|-------------------------------------------------------------------------------------------------------------------------------------------------------------------------------------------------------|
| Location  | 10.15156/BIO/TH069632                                                                                                                                                                                 |
| Citation  | Kõljalg, Urmas; Abarenkov, Kessy; Nilsson, R. Henrik; Larsson, Karl-Henrik; May, Tom W.; Taylor, A.F.S.; Frieslev, Tobias G.; Põldmaa, Kadri (2023); TH069632. UNITE Community, 10.15156/BIO/TH069632 |
| Publisher | UNITE Community                                                                                                                                                                                       |
| Published | 2023                                                                                                                                                                                                  |
| Creators  | Kõljalg, Urmas; Abarenkov, Kessy; Nilsson, R. Henrik; Larsson, Karl-Henrik; May, Tom W.; Taylor, A.F.S.; Frieslev, Tobias G.; Põldmaa, Kadri.                                                         |
| Documents | TH069632_v1.0.json                                                                                                                                                                                    |

### Detailed information

|                     |                                                                                                                                                                                                                                                                                                                                                                                                                                                                                                                                                                                                                               |
|---------------------|-------------------------------------------------------------------------------------------------------------------------------------------------------------------------------------------------------------------------------------------------------------------------------------------------------------------------------------------------------------------------------------------------------------------------------------------------------------------------------------------------------------------------------------------------------------------------------------------------------------------------------|
| Title               | TH069632                                                                                                                                                                                                                                                                                                                                                                                                                                                                                                                                                                                                                      |
| Subtitle            | Boletales                                                                                                                                                                                                                                                                                                                                                                                                                                                                                                                                                                                                                     |
| Location            | <a href="https://dx.doi.org/10.15156/BIO/TH069632">https://dx.doi.org/10.15156/BIO/TH069632</a>                                                                                                                                                                                                                                                                                                                                                                                                                                                                                                                               |
| Publisher           | UNITE Community                                                                                                                                                                                                                                                                                                                                                                                                                                                                                                                                                                                                               |
| Published           | 2023                                                                                                                                                                                                                                                                                                                                                                                                                                                                                                                                                                                                                          |
| Resource type       | Dataset/UNITE Taxon Hypothesis                                                                                                                                                                                                                                                                                                                                                                                                                                                                                                                                                                                                |
| Creators            | Kõljalg, Urmas; Abarenkov, Kessy; Nilsson, R. Henrik; Larsson, Karl-Henrik; May, Tom W.; Taylor, A.F.S.; Frieslev, Tobias G.; Põldmaa, Kadri.                                                                                                                                                                                                                                                                                                                                                                                                                                                                                 |
| Taxa                | Boletales E.-J. Gilbert, 1931                                                                                                                                                                                                                                                                                                                                                                                                                                                                                                                                                                                                 |
| Contributors        | <ul style="list-style-type: none"><li>ContactPerson: Abarenkov, Kessy</li><li>DataManager: Zirk, Allan</li><li>DataManager: Pirrmann, Timo</li><li>DataManager: Põhönen, Ralvo</li><li>DataManager: Ivanov, Filip</li><li>HostingInstitution: UTE - University of Tartu; Natural History Museum and Botanical Garden</li></ul>                                                                                                                                                                                                                                                                                                |
| Dates               | <ul style="list-style-type: none"><li>Available: 2023-08-11</li></ul>                                                                                                                                                                                                                                                                                                                                                                                                                                                                                                                                                         |
| Funders             |                                                                                                                                                                                                                                                                                                                                                                                                                                                                                                                                                                                                                               |
| Abstract            | Here we present the novel 'taxon hypothesis' (TH) concept to accommodate fungal 'species hypothesis' (SH) into existing classification frameworks for taxonomic communication. As supported with Digital Object Identifiers (DOIs), THs are flexible in time and enable direct cross-communication of higher level taxa along with evolving classification schemes. Every TH includes given number of SHs and consequently fixed number of fungal rDNA ITS sequences. DNA sequences generated by high-throughput or Sanger sequencing studies and identified against UNITE SHs will be automatically assigned to THs as well. |
| Formats             | <ul style="list-style-type: none"><li>application/json</li></ul>                                                                                                                                                                                                                                                                                                                                                                                                                                                                                                                                                              |
| Subjects/keywords   |                                                                                                                                                                                                                                                                                                                                                                                                                                                                                                                                                                                                                               |
| Licence             | Attribution-NonCommercial (CC BY-NC)                                                                                                                                                                                                                                                                                                                                                                                                                                                                                                                                                                                          |
| Citation            | Kõljalg, Urmas; Abarenkov, Kessy; Nilsson, R. Henrik; Larsson, Karl-Henrik; May, Tom W.; Taylor, A.F.S.; Frieslev, Tobias G.; Põldmaa, Kadri (2023); TH069632. UNITE Community, 10.15156/BIO/TH069632                                                                                                                                                                                                                                                                                                                                                                                                                         |
| Related identifiers |                                                                                                                                                                                                                                                                                                                                                                                                                                                                                                                                                                                                                               |
| Alternate           |                                                                                                                                                                                                                                                                                                                                                                                                                                                                                                                                                                                                                               |

Supplementary Figure 3. Browsing and searching third-party curations added by the members of the UNITE community.

Example 1: Locality info and isolation source specified, taxon re-identification added for KJ180283.

UNITE - Search

Search by SH code ...

Species Hypotheses Sequences **Curations**

... or search third-party annotations:

Taxon name   Include sub-taxa

Annotated by

Annotated field

Third-party annotations: 2 records found. Showing records 1 - 2

| #  | Accession number             | Taxon name        | Typification | Annotated at     | Annotated by  | Country | Locality text |
|----|------------------------------|-------------------|--------------|------------------|---------------|---------|---------------|
| 1. | <a href="#">MF687864 ENA</a> | <i>Boletus</i>    |              | 2023-01-24 09:24 | Urmaz Köljalğ | China   |               |
| 2. | <a href="#">KJ180283 ENA</a> | <i>Sakaguchia</i> |              | 2022-02-01 08:07 | Urmaz Köljalğ | China   |               |

ENA European Nucleotide Archive

Sequence: KJ180283.1

Uncultured eukaryote clone KJ180283.1: 285 18S ribosomal RNA gene, partial sequence; Internal transcribed spacer 1, 5.8S ribosomal RNA gene, and internal transcribed spacer 2, complete sequence; and 28S ribosomal RNA gene, partial sequence.

Organism: uncultured eukaryote  
Accession: KJ180283  
Mol Type: genomic DNA  
Topology: linear  
Base Count: 603  
Dataclass: STD  
Tax Division: ENV  
Keywords: ENA  
Environmental Sample: true  
MIS Checksum: d98D746b4263a156e6970161567c7

3rd Party Curations

| Operation | Attribute Name   | Attribute Value      | Assertion Method | Assertion Evidences               | Provider Name | Status |
|-----------|------------------|----------------------|------------------|-----------------------------------|---------------|--------|
| Add       | organism         | Sakaguchia           | manual assertion | evidence used in manual assertion | plutof        |        |
| Add       | identified_by    | Urmaz Köljalğ        | manual assertion | evidence used in manual assertion | plutof        |        |
| Add       | db_xref          | taxon:10602          | manual assertion | evidence used in manual assertion | plutof        |        |
| Add       | type_material    |                      | manual assertion | evidence used in manual assertion | plutof        |        |
| Add       | isolation_source | Water                | manual assertion | evidence used in manual assertion | plutof        |        |
| Add       | country          | China:Shandong       | manual assertion | evidence used in manual assertion | plutof        |        |
| Add       | lat_lon          | 37.890 S 121.88736 E | manual assertion | evidence used in manual assertion | plutof        |        |

ebi.ac.uk/ena/clearinghouse/api/curations/KJ180283

```

{
  "curations": [
    {
      "id": "ff850ca9-a23a-4e15-8897-c11bd62c4312",
      "recordType": "sequence",
      "recordId": "KJ180283",
      "primaryRecordId": "KJ180283.1",
      "dataIdentifier": "plutof",
      "attributePost": "organism",
      "valuePost": "Sakaguchia",
      "attributeDelete": false,
      "assertionMethod": "manual assertion",
      "assertionEvidences": [
        {
          "identifier": "ECO:0000352",
          "shortForm": "ECO_0000352",
          "label": "evidence used in manual assertion"
        }
      ]
    },
    {
      "id": "a61bd2e9-38bd-4268-ae84-501d501ba3fe",
      "recordType": "sequence",
      "recordId": "KJ180283",
      "primaryRecordId": "KJ180283.1",
      "dataIdentifier": "plutof",
      "attributePost": "identified_by",
      "valuePost": "Urmaz Köljalğ",
      "attributeDelete": false,
      "assertionMethod": "manual assertion",
      "assertionEvidences": [
        {
          "identifier": "ECO:0000352",
          "shortForm": "ECO_0000352",
          "label": "evidence used in manual assertion"
        }
      ]
    }
  ]
}
    
```

Example 2: Data on typification and newly described taxon name added for OQ073926.

UNITE - Search

Search by SH code ...

Species Hypotheses Sequences **Curations**

... or search third-party annotations:

Taxon name   Include sub-taxa

Annotated by

Annotated field

Third-party annotations: 31 records found. Showing records 1 - 31

| #  | Accession number             | Taxon name                                              | Typification | Annotated at     | Annotated by | Country                          | Locality text |
|----|------------------------------|---------------------------------------------------------|--------------|------------------|--------------|----------------------------------|---------------|
| 1. | <a href="#">OQ073926 ENA</a> | <i>Placopyrenium pseudocineretum</i>                    | Holotype     | 2023-08-28 01:44 | Yui Fujinuma |                                  |               |
| 2. | <a href="#">AB540582 ENA</a> | <i>Gliomastix tumulicola</i>                            | Ex-holotype  | 2023-05-03 01:22 | Yui Fujinuma |                                  |               |
| 3. | <a href="#">AB709658 ENA</a> | <i>Pochonia boninensis</i>                              | Ex-holotype  | 2023-05-01 07:06 | Yui Fujinuma | Chichijima, Bonin Islands, Tokyo |               |
| 4. | <a href="#">AB709648 ENA</a> | <i>Pochonia chlamydosporia</i> var. <i>ellipsoidora</i> | Ex-holotype  | 2023-05-01 06:55 | Yui Fujinuma | Angashima Island, Tokyo          |               |
| 5. | <a href="#">AB670709 ENA</a> | <i>Virgaria boninensis</i>                              | Ex-holotype  | 2023-05-01 06:00 | Yui Fujinuma | Chichijima, Bonin Islands, Tokyo |               |

ENA European Nucleotide Archive

Sequence: OQ073926.1

*Placopyrenium* sp. HT-2023a voucher: STU5MNS-STU-F-0002927 internal transcribed spacer 1, partial sequence; 5.8S ribosomal RNA gene, complete sequence; and internal transcribed spacer 2, partial sequence.

Organism: *Placopyrenium* sp. HT-2023a  
Accession: OQ073926  
Mol Type: genomic DNA  
Topology: linear  
Base Count: 498  
Dataclass: STD  
Tax Division: FUN  
Location: 40.38 N 141.94 E  
Specimen Voucher: STU5MNS-STU-F-0002927  
Country: Italy: Sardinia, Sassari Province, Burgos

3rd Party Curations

| Operation | Attribute Name | Attribute Value                                  | Assertion Method | Assertion Evidences           | Provider Name | Status |
|-----------|----------------|--------------------------------------------------|------------------|-------------------------------|---------------|--------|
| Add       | db_xref        | taxon:3038975                                    | manual assertion | documented statement evidence | plutof        |        |
| Add       | type_material  | Holotype of <i>Placopyrenium pseudocineretum</i> | manual assertion | documented statement evidence | plutof        |        |
| Add       | organism       | <i>Placopyrenium pseudocineretum</i>             | manual assertion | documented statement evidence | plutof        |        |
| Add       | identified_by  | Yui Fujinuma                                     | manual assertion | documented statement evidence | plutof        |        |

All third-party curations pushed to European Nucleotide Archive can be fetched programmatically using the Elixir Contextual Data ClearingHouse RESTful API - <https://www.ebi.ac.uk/ena/clearinghouse/api/>.
